# Supplementary material for: No Evidence of Sensory Neuropathy in a Traditional Mouse Model of Idiopathic Parkinson’s Disease
Source: MDPI journal article supplement (doi:10.3390/cells13100799), 2024-05-08
Supplement: s1 [file s1]

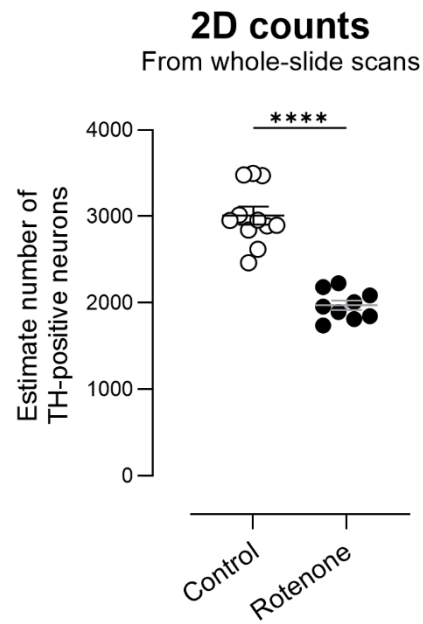

S1 file. Counts of TH-positive neurons in SNpc from whole-slide scans of a stereological series (1:6) through the entire SNpc. \*\*\*\* $p < 0.0001$  (Mann Whitney test). Symbols are of individual mice, and horizontal bars show mean  $\pm$  SEM.
